# Supplementary material
Source: PubMed Central journal article supplement (PMC3435226)
Supplement: 1112965109_sapp.pdf [file 1112965109_sapp.pdf]

Online Supporting Information for the article:  
“Suicide and Drought in NSW, Australia, 1970-2007”.

Ivan C. Hanigan<sup>1,2</sup>      Colin D. Butler<sup>1</sup>      Philip N. Kokic<sup>2</sup>  
Michael F. Hutchinson<sup>3</sup>

[<sup>1</sup>]National Centre for Epidemiology and Population Health, Australian National University

[<sup>2</sup>]Commonwealth Scientific and Industrial Research Organisation

[<sup>3</sup>]Fenner School of Environment and Society, Australian National University.

## Contents

|          |                                                            |          |
|----------|------------------------------------------------------------|----------|
| <b>1</b> | <b>Introduction</b>                                        | <b>1</b> |
| <b>2</b> | <b>Drought Index</b>                                       | <b>2</b> |
| 2.1      | Calculate the Drought Index . . . . .                      | 2        |
| <b>3</b> | <b>Suicide and Drought Modeling</b>                        | <b>2</b> |
| 3.1      | Descriptive Statistics of Drought and Suicide . . . . .    | 2        |
| 3.2      | Correlation between Temperature and Drought . . . . .      | 4        |
| 3.3      | Core Model Diagnostics and Variable Selection . . . . .    | 4        |
| 3.4      | Suicide and Drought Model by Age, Sex and Region . . . . . | 6        |
| 3.5      | Attributable Number of Deaths . . . . .                    | 8        |
| 3.6      | Test the Sex Stratification . . . . .                      | 8        |
| <b>4</b> | <b>Sensitivity Analyses</b>                                | <b>8</b> |
| 4.1      | Enhanced Drought Index . . . . .                           | 8        |
| 4.2      | Self-harm Coded as Undetermined . . . . .                  | 8        |
| 4.3      | Drop High Leverage Points . . . . .                        | 9        |

## 1 Introduction

This document accompanies the R code at this website <https://github.com/ivanhanigan/SuicideAndDroughtInNSW> to calculate the Hutchinson Drought Index and fit the regression models for the paper ‘Suicide and Drought in New South Wales (NSW), Australia, 1970-2007’. The calculation of the Drought Index is demonstrated using free data from the Australian Bureau of Meteorology. The suicide mortality data are not publicly available due to confidentiality restrictions. The R code we ran the regressions with is included but the original data are only available for authorised users approved by the Australian Bureau of Statistics and the NSW Registrar of Births Deaths and Marriages.

## 2 Drought Index

The R code includes a demonstration of the Hutchinson Drought Index [1]. This climatic drought index is shown graphically for a location in the ‘Central West’ SD of NSW in Figure 1.

Instructions for using R to download and analyse the spatial data from the Australian Bureau of Statistics (<http://www.abs.gov.au>) and the weather data from the Australian Bureau of Meteorology (<http://www.bom.gov.au>) websites are included.

### 2.1 Calculate the Drought Index

The Drought index is shown in Figure 1 for the SD of ‘Central West NSW’ during a period which includes a strong drought (1979-83). The raw monthly rainfall totals are integrated to rolling 6-monthly totals (both shown in first panel) which are then ranked into percentiles by month and this is rescaled to range between -4 and +4 in keeping with the range of the Palmer Index [2] (second panel). Mild drought is below -1 in the Palmer index and so consecutive months below this threshold are counted. In the original method 5 or more consecutive months was defined as the beginning of a drought, which continued until the rescaled percentiles exceed -1 again (third panel). The enhanced method imposes a more conservative threshold of zero (the median) to break a drought (fourth panel).

There was also an alternative method devised by Hutchinson where the rescaled percentile values are integrated using conditional cumulative sums. That method is included in the R code however we decided not to use it in this study because the counting method is simpler and gives similar results.

## 3 Suicide and Drought Modeling

### 3.1 Descriptive Statistics of Drought and Suicide

Descriptive statistics for the Drought Index are shown in Table 1. Summary statistics for Suicide rates are shown in Table 2.

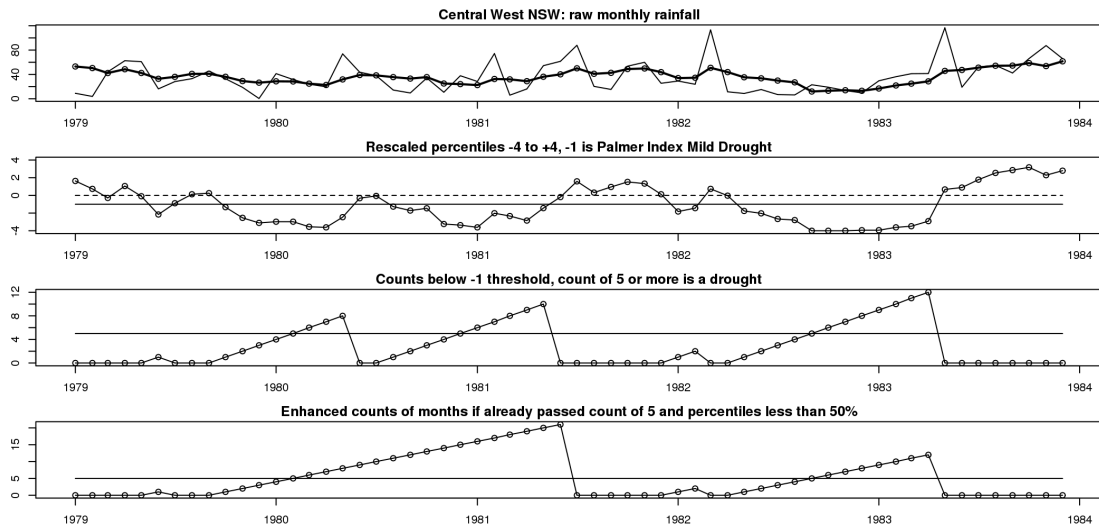

Figure 1: The Drought index in Central West NSW with the enhanced method shown in the fourth panel.

Table 1: Descriptive statistics for the drought index

| SD group                | N droughts | Avg Duration | Max Duration |
|-------------------------|------------|--------------|--------------|
| 1 Central West          | 9          | 8            | 12           |
| 2 Hunter                | 11         | 7            | 15           |
| 3 Illawarra             | 7          | 9            | 16           |
| 4 Mid-North Coast       | 8          | 8            | 15           |
| 5 Murray                | 7          | 8            | 11           |
| 6 Murrumbidgee          | 10         | 7            | 11           |
| 7 North and Far Western | 8          | 7            | 12           |
| 8 Northern              | 5          | 8            | 11           |
| 9 Richmond-Tweed        | 13         | 8            | 17           |
| 10 South Eastern        | 8          | 8            | 11           |
| 11 Sydney               | 9          | 9            | 20           |

Table 2: Descriptive statistics for suicide (PYL = Person Years Lived)

| SD group                | Avg Death/Month | Avg Pop | Rate/100000 PYL |
|-------------------------|-----------------|---------|-----------------|
| 1 Central West          | 2               | 138202  | 13              |
| 2 Hunter                | 5               | 430403  | 13              |
| 3 Illawarra             | 3               | 280037  | 13              |
| 4 Mid-North Coast       | 2               | 183521  | 12              |
| 5 Murray                | 1               | 86221   | 14              |
| 6 Murrumbidgee          | 1               | 118778  | 13              |
| 7 North and Far Western | 2               | 114460  | 16              |
| 8 Northern              | 2               | 146465  | 14              |
| 9 Richmond-Tweed        | 2               | 139356  | 14              |
| 10 South Eastern        | 2               | 135091  | 14              |
| 11 Sydney               | 34              | 3040952 | 13              |

### 3.2 Correlation between Temperature and Drought

We found that monthly maximum temperature variables are not strongly correlated with the drought index in our dataset. Correlation coefficients for the variables are shown in Table 3.

Table 3: Correlations

| Variables                                                | Correlation |
|----------------------------------------------------------|-------------|
| $\text{cor}(\text{logDroughtCount}, \text{tmax})$        | 0.05        |
| $\text{cor}(\text{tmax}, \text{tmaxanomaly})$            | 0.23        |
| $\text{cor}(\text{logDroughtCount}, \text{tmaxanomaly})$ | 0.35        |

### 3.3 Core Model Diagnostics and Variable Selection

We initially fitted age stratified time series Poisson Generalized Linear Models (GLMs). We identified a Core Model that included age, sex, region, season and long term trend. We assessed standard model diagnostics for this. Then we used Generalized Additive Models (GAMs) with the automatic estimation of the optimal amount of smoothing on the drought index using penalised regression splines from the R package: `mgcv` [3]. These estimated smooths were then explored in GLMs. Many models were fitted to test different combinations of variables. The models are ranked by their Bayesian Information Criterion (BIC) scores in Table 4 (AIC is shown for interest).

Table 4: Models ranked by Bayesian Information Criterion (BIC).

| Model                              | Parameters | BIC   | AIC   |
|------------------------------------|------------|-------|-------|
| sd_group*sex                       | 78         | 69715 | 69001 |
| age*sex*ns(time,df=3)              | 68         | 69814 | 69191 |
| tmaxanomModel                      | 69         | 69816 | 69184 |
| tmax_anomaly*sex                   | 70         | 69827 | 69186 |
| tmaxModel                          | 71         | 69830 | 69180 |
| ns(tmax,3)*sex                     | 74         | 69831 | 69154 |
| ageSexTrendSineXtra                | 70         | 69835 | 69194 |
| droughtModel                       | 73         | 69845 | 69186 |
| tmax_anomaly*ns(time,3)            | 72         | 69847 | 69188 |
| sd_group*ns(time,3)                | 98         | 69859 | 68962 |
| With Rural 30-49 Sex Strata        | 98         | 69869 | 69127 |
| Without Rural 30-49 Sex Strata     | 97         | 69873 | 69141 |
| ns(tmax,3)*tmax_anomaly            | 75         | 69874 | 69187 |
| tmax_anomaly*agegp                 | 75         | 69877 | 69191 |
| ns(logDroughtCount,5)*tmax_anomaly | 79         | 69884 | 69179 |
| ns(logDroughtCount,5)*sex          | 78         | 69885 | 69189 |
| tmax_anomaly*sd_group              | 79         | 69904 | 69181 |
| ns(tmax,3)*ns(time,3)              | 80         | 69909 | 69176 |
| interactionDrtAgeSexRuralModel2    | 188        | 69937 | 69091 |
| ns(logDroughtCount,5)*ns(time,3)   | 88         | 69963 | 69194 |
| ns(logDroughtCount,5)*ns(tmax,3)   | 91         | 69968 | 69171 |
| ns(tmax,3)*agegp                   | 89         | 70012 | 69197 |
| sd_group*sex*ns(time,3)            | 138        | 70075 | 68812 |
| ns(logDroughtCount,5)*agegp        | 103        | 70080 | 69201 |
| ns(tmax,3)*sd_group                | 101        | 70117 | 69192 |
| ns(logDroughtCount,5)*sd_group     | 123        | 70250 | 69225 |
| agegp*sd_group                     | 128        | 70347 | 69175 |
| sd_group*age*sex*ns(time,df=3)     | 618        | 74801 | 69143 |

### 3.4 Suicide and Drought Model by Age, Sex and Region

Our final GAM estimated curved response functions for drought and suicide by age, sex and region are shown in Figure 2. This model is labelled ‘interactionDrtAgeSexRuralModel2’ in Table 4. It included drought effects for each age/sex/region subgroup:

$$\begin{aligned}
 \log(O_{ijk}) = & \ s(Drought \times Sex \times AgeGroupBy20years \times RuralOrUrbanRegion) \\
 & + AgeGroupBy10years_i \times Sex_j \times s(Time, df = 3, basis = NaturalCubicSpline) \\
 & + StatisticalDivision_k \\
 & + s(Month, df = 4, basis = CyclicCubicSpline) \\
 & + s(tmaxAnomaly) \\
 & + offset(\log(Pop_{ijk}))
 \end{aligned}$$

Where:

- $O_{ijk}$  = monthly suicide counts by AgeGroupBy10years<sub>i</sub>, Sex<sub>j</sub> and StatisticalDivision<sub>k</sub>
- $s(Drought \times Sex \times AgeGroupBy20years \times RuralOrUrbanRegion)$  are interaction effects
- Time = the month number in the sequence from Jan-1970 until Oct-2007
- Month = the months of the year ranked from 1 to 12
- $s()$  = penalized regression splines, degrees of freedom (df) may be specified
- tmaxAnomaly = monthly averaged temperature maxima anomalies from long term averages
- $Pop_{ijk}$  = interpolated population by month in each group

The eleven regions were classified as rural or urban based on the locations of the three major cities of NSW: Sydney, Newcastle and Wollongong. All other regions were classed as rural.

The estimated degrees of freedom from the GAM were then used with parametric splines in a GLM to estimate the effect sizes. A key drought effect reported in the paper was for rural males aged 30-49 where an Interquartile Range (IQR) rise in drought index gave a Relative Risk (RR) of 1.15 (95CI 1.08 to 1.22). The IQR for the drought index is about 2 months. For the temperature anomaly term there was a RR of 1.03 (95CI 1.01 to 1.05) per IQR rise (1.6 degrees C).

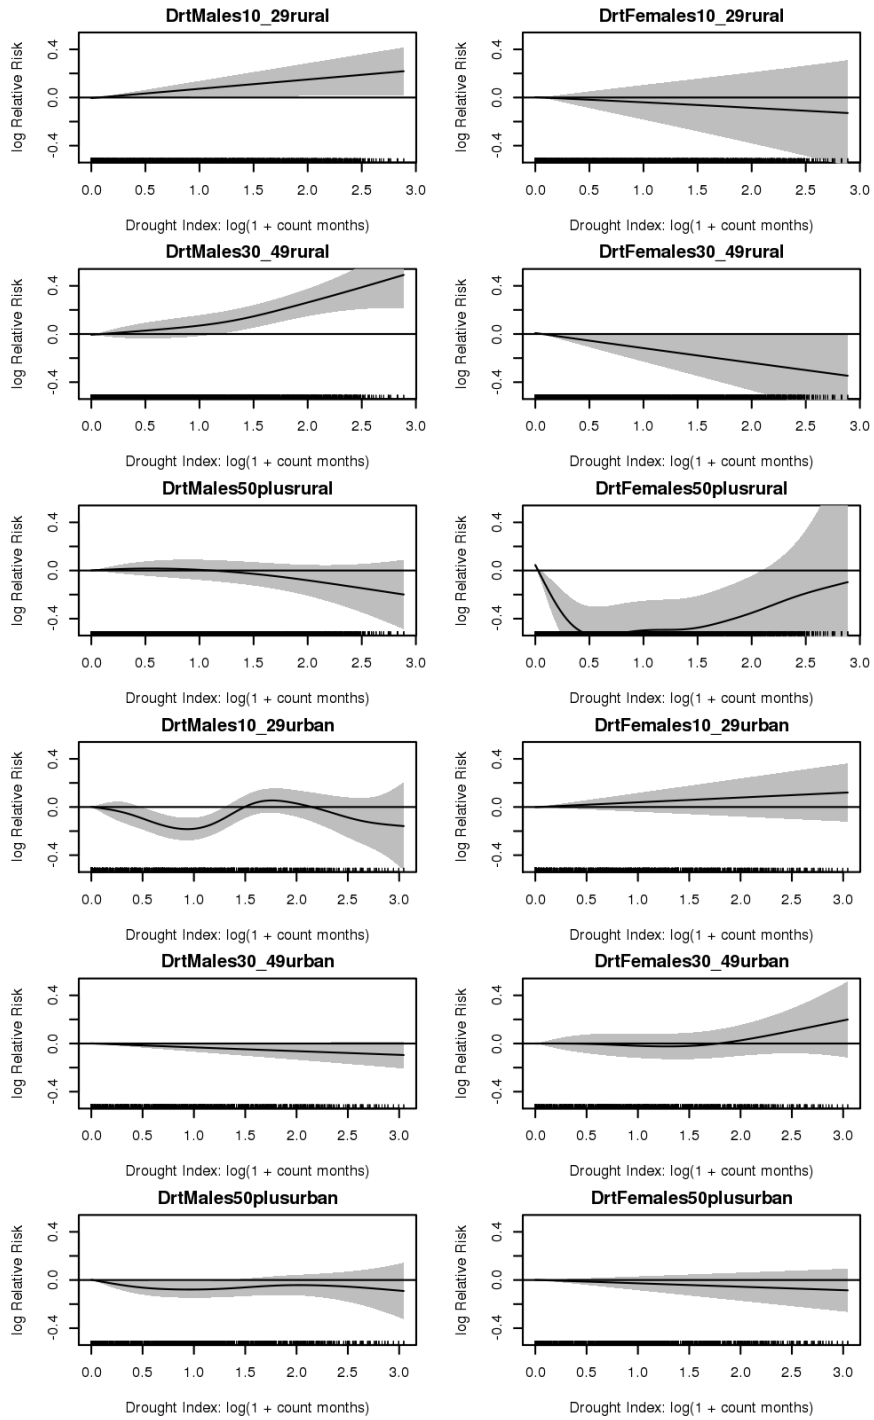

Figure 2: Estimated response functions for suicide and drought in each of the subgroups.

### **3.5 Attributable Number of Deaths**

The predicted number of rural male suicides aged 30-49 per annum associated with droughts over our study period was 4.01 (95%CI 2.14 to 6.05,  $p = 0.000015$ ), accounting for 9% of the total in 38 years.

However this effect only applies in the months that were in drought, and to a greater extent depending on the intensity of the drought. As drought is a rare and episodic event this estimate is obviously an underestimate of the real impact in terms of numbers of deaths during droughts and potential years of life lost.

The predicted number of rural female suicides aged 30-49 per annum associated with droughts are estimated for comparison with the figure for males. The decreased number of rural female suicides aged 30-49 per annum associated with droughts over our study period was -0.72 (95%CI -1.32 to -0.01,  $p = 0.041787$ ).

### **3.6 Test the Sex Stratification**

To find out if the inclusion of a separate term for Rural Males and Rural Females aged 30-49 is warranted we performed a likelihood ratio test with an alternative model where the drought effect was not stratified by sex. The model was significantly better when including the Rural 30-49 sex stratification (likelihood ratio test  $p = 0.000077$ ).

## **4 Sensitivity Analyses**

### **4.1 Enhanced Drought Index**

We conducted sensitivity analyses for the drought exposure variable. The drought index was enhanced with the threshold needed to end a drought made more stringent. For example in Figure 1 the drought in 1980 would not have ended in the middle of that year given the new threshold but would have continued into 1981 (the fourth panel).

The drought effects estimated were similar to those from our previous modeling.

### **4.2 Self-harm Coded as Undetermined**

A sensitivity analysis was conducted that combined the suicide deaths with deaths coded as 'Self inflicted injury, undetermined if intentional'. This analysis agreed with our previous modelling.



### 4.3 Drop High Leverage Points

A sensitivity analysis was finally conducted that dropped any observations identified as having high leverage. Dropping these observations from the final model produced effect estimates that also agreed with our prior modeling results

## References

- [1] Smith, D. I, Hutchinson, M. F, & McArthur, R. J. (1992) *Climatic and Agricultural Drought: Payments and Policy*. (Centre for Resource and Environmental Studies, Australian National University, Canberra, Australia).
- [2] Palmer, W. (1965) *Meteorological drought. Research paper No. 45*. (U.S. Department of Commerce Weather Bureau, Washington, D.C.).
- [3] Wood, S. (2008) Fast stable direct fitting and smoothness selection for generalized additive models. *Journal of the Royal Statistical Society: Series B (Statistical Methodology)* **70**, 495–518.
